# Supplementary material
Source: ML conference proceedings conference paper supplement (https://proceedings.neurips.cc/paper_files/paper/2016/hash/7b1ce3d73b70f1a7246e7b76a35fb552-Abstract.html)
Supplement: Supplementary file [file 7b1ce3d73b70f1a7246e7b76a35fb552-Supplemental.zip]

---

# Supplementary Material: A Minimax Approach to Supervised Learning

---

**Farzan Farnia, David Tse**  
 Department of Electrical Engineering  
 Stanford University  
 {farnia, dntse}@stanford.edu

## 1 Proof of Theorem 1

### 1.a Weak Version

First, we list the assumptions of the weak version of Theorem 1:

- $\Gamma$  is convex and closed,
- Loss function  $L$  is bounded by a constant  $C$ ,
- $\mathcal{X}, \mathcal{Y}$  are finite,
- Risk set  $S = \{ [L(y, a)]_{y \in \mathcal{Y}} : a \in \mathcal{A} \}$  is closed.

Given these assumptions, Sion's minimax theorem [1] implies that the minimax problem has a finite answer  $H^*$ ,

$$H^* := \sup_{P \in \Gamma} \inf_{\psi \in \Psi} \mathbb{E}[L(Y, \psi(X))] = \inf_{\psi \in \Psi} \sup_{P \in \Gamma} \mathbb{E}[L(Y, \psi(X))]. \quad (1)$$

Thus, there exists a sequence of decision rules  $(\psi_n)_{n=1}^\infty$  for which

$$\lim_{n \rightarrow \infty} \sup_{P \in \Gamma} \mathbb{E}[L(Y, \psi_n(X))] = H^*. \quad (2)$$

As we supposed, the risk set  $S$  is closed. Therefore, the randomized risk set<sup>1</sup>  $S_r = \{ [L(y, \zeta)]_{y \in \mathcal{Y}} : \zeta \in \mathcal{Z} \}$  defined over the space of randomized acts  $\mathcal{Z}$  is also closed and, since  $L$  is bounded, is a compact subset of  $\mathbb{R}^{|\mathcal{Y}|}$ . Therefore, since  $\mathcal{X}$  and  $\mathcal{Y}$  are both finite, we can find a randomized decision rule  $\psi^*$  which on taking a subsequence  $(n_k)_{k=1}^\infty$  satisfies

$$\forall x \in \mathcal{X}, y \in \mathcal{Y} : L(y, \psi^*(x)) = \lim_{k \rightarrow \infty} L(y, \psi_{n_k}(x)). \quad (3)$$

Then  $\psi^*$  is a robust Bayes decision rule against  $\Gamma$ , because

$$\sup_{P \in \Gamma} \mathbb{E}[L(Y, \psi^*(X))] = \sup_{P \in \Gamma} \lim_{k \rightarrow \infty} \mathbb{E}[L(Y, \psi_{n_k}(X))] \leq \lim_{k \rightarrow \infty} \sup_{P \in \Gamma} \mathbb{E}[L(Y, \psi_{n_k}(X))] = H^*. \quad (4)$$

Moreover, since  $\Gamma$  is assumed to be convex and closed (hence compact),  $H(Y|X)$  achieves its supremum over  $\Gamma$  at some distribution  $P^*$ . By the definition of conditional entropy, (4) implies that

$$E_{P^*}[L(Y, \psi^*(X))] \leq \sup_{P \in \Gamma} \mathbb{E}[L(Y, \psi^*(X))] \leq H^* = H_{P^*}(Y|X), \quad (5)$$

which shows that  $\psi^*$  is a Bayes decision rule for  $P^*$  as well. This completes the proof.

---

<sup>1</sup>  $L(y, \zeta)$  is a short-form for  $E[L(y, A)]$  where  $A \in \mathcal{A}$  is a random action distributed according to  $\zeta$ .

## 1.b Strong Version

Let's recall the assumptions of the strong version of Theorem 1:

- $\Gamma$  is convex.
- For any distribution  $P \in \Gamma$ , there exists a Bayes decision rule.
- We assume continuity in Bayes decision rules over  $\Gamma$ , i.e., if a sequence of distributions  $(Q_n)_{n=1}^\infty \in \Gamma$  with the corresponding Bayes decision rules  $(\psi_n)_{n=1}^\infty$  converges to  $Q$  with a Bayes decision rule  $\psi$ , then under any  $P \in \Gamma$ , the expected loss of  $\psi_n$  converges to the expected loss of  $\psi$ .
- $P^*$  maximizes the conditional entropy  $H(Y|X)$ .

**Note:** A particular structure used in our paper is given by fixing the marginal  $P_X$  across  $\Gamma$ . Under this structure, the condition of the continuity in Bayes decision rules reduces to the continuity in Bayes acts over  $P_Y$ 's in  $\Gamma_{Y|X}$ . It can be seen that while this condition holds for the logarithmic and quadratic loss functions, it does not hold for the 0-1 loss.

Let  $\psi^*$  be a Bayes decision rule for  $P^*$ . We need to show that  $\psi^*$  is a robust Bayes decision rule against  $\Gamma$ . To show this, it suffices to show that  $(P^*, \psi^*)$  is a saddle point of the mentioned minimax problem, i.e.,

$$\mathbb{E}_{P^*}[L(Y, \psi^*(X))] \leq \mathbb{E}_{P^*}[L(Y, \psi(X))], \quad (6)$$

and

$$\mathbb{E}_{P^*}[L(Y, \psi^*(X))] \geq \mathbb{E}_P[L(Y, \psi^*(X))]. \quad (7)$$

Clearly, inequality (6) holds due to the definition of the Bayes decision rule. To show (7), let us fix an arbitrary distribution  $P \in \Gamma$ . For any  $\lambda \in (0, 1]$ , define  $P_\lambda = \lambda P + (1 - \lambda)P^*$ . Notice that  $P_\lambda \in \Gamma$  since  $\Gamma$  is convex. Let  $\psi_\lambda$  be a Bayes decision rule for  $P_\lambda$ . Due to the linearity of the expected loss in the probability distribution, we have

$$\begin{aligned} \mathbb{E}_P[L(Y, \psi_\lambda(X))] - \mathbb{E}_{P^*}[L(Y, \psi_\lambda(X))] &= \frac{\mathbb{E}_{P_\lambda}[L(Y, \psi_\lambda(X))] - \mathbb{E}_{P^*}[L(Y, \psi_\lambda(X))]}{\lambda} \\ &\leq \frac{H_{P_\lambda}(Y|X) - H_{P^*}(Y|X)}{\lambda} \\ &\leq 0, \end{aligned}$$

for any  $0 < \lambda \leq 1$ . Here the first inequality is due to the definition of the conditional entropy and the last inequality holds since  $P^*$  maximizes the conditional entropy over  $\Gamma$ . Applying the assumption of the continuity in Bayes decision rules, we have

$$\mathbb{E}_P[L(Y, \psi^*(X))] - \mathbb{E}_{P^*}[L(Y, \psi^*(X))] = \lim_{\lambda \rightarrow 0} \mathbb{E}_P[L(Y, \psi_\lambda(X))] - \mathbb{E}_{P^*}[L(Y, \psi_\lambda(X))] \leq 0, \quad (8)$$

which makes the proof complete.

## 2 Proof of Theorem 2

Let us recall the definition of the set  $\Gamma(Q)$ :

$$\begin{aligned} \Gamma(Q) &= \{ P_{\mathbf{X}, Y} : P_{\mathbf{X}} = Q_{\mathbf{X}}, \\ &\quad \forall 1 \leq i \leq t : \|\mathbb{E}_P[\theta_i(Y)\mathbf{X}] - \mathbb{E}_Q[\theta_i(Y)\mathbf{X}]\| \leq \epsilon_i \}. \end{aligned} \quad (9)$$

Defining  $\tilde{\mathbf{E}}_i \triangleq \mathbb{E}_Q[\theta_i(Y)\mathbf{X}]$  and  $C_i \triangleq \{\mathbf{u} : \|\mathbf{u} - \tilde{\mathbf{E}}_i\| \leq \epsilon_i\}$ , we have

$$\max_{P \in \Gamma(Q)} H(Y|\mathbf{X}) = \max_{P, \mathbf{w}: \forall i: \mathbf{w}_i = \mathbb{E}_P[\theta_i(Y)\mathbf{X}]} \mathbb{E}_{Q_{\mathbf{X}}}[H_P(Y|\mathbf{X} = \mathbf{x})] + \sum_{i=1}^t I_{C_i}(\mathbf{w}_i) \quad (10)$$

where  $I_C$  is the indicator function for the set  $C$  defined as

$$I_C(x) = \begin{cases} 0 & \text{if } x \in C, \\ -\infty & \text{Otherwise.} \end{cases} \quad (11)$$

First of all, the law of iterated expectations implies that  $\mathbb{E}_P[\theta_i(Y)|\mathbf{X}] = \mathbb{E}_{Q_{\mathbf{X}}}[\mathbf{X} \mathbb{E}[\theta_i(Y)|\mathbf{X} = \mathbf{x}]]$ . Furthermore, (10) is equivalent to a convex optimization problem where it is not hard to check that the Slater condition is satisfied. Hence strong duality holds and we can write the dual problem as

$$\min_{\mathbf{A}} \sup_{P_{Y|\mathbf{X}}, \mathbf{w}} \mathbb{E}_{Q_{\mathbf{X}}} \left[ H_P(Y|\mathbf{X} = \mathbf{x}) + \sum_{i=1}^t \mathbb{E}[\theta_i(Y)|\mathbf{X} = \mathbf{x}] \mathbf{A}_i \mathbf{X} \right] + \sum_{i=1}^t [I_{C_i}(\mathbf{w}_i) - \mathbf{A}_i \mathbf{w}_i], \quad (12)$$

where the rows of matrix  $\mathbf{A}$ , denoted by  $\mathbf{A}_i$ , are the Lagrange multipliers for the constraints of  $\mathbf{w}_i = \mathbb{E}_P[\theta_i(Y)|\mathbf{X}]$ . Notice that the above problem decomposes across  $P_{Y|\mathbf{X}=\mathbf{x}}$ 's and  $\mathbf{w}_i$ 's. Hence, the dual problem can be rewritten as

$$\min_{\mathbf{A}} \left[ \mathbb{E}_{Q_{\mathbf{X}}} \left[ \sup_{P_{Y|\mathbf{X}=\mathbf{x}}} H_P(Y|\mathbf{X} = \mathbf{x}) + \sum_{i=1}^t \mathbb{E}[\theta_i(Y)|\mathbf{X} = \mathbf{x}] \mathbf{A}_i \mathbf{X} \right] + \sum_{i=1}^t \sup_{\mathbf{w}_i} [I_{C_i}(\mathbf{w}_i) - \mathbf{A}_i \mathbf{w}_i] \right] \quad (13)$$

Furthermore, according to the definition of  $F_{\theta}$ , we have

$$F_{\theta}(\mathbf{A}\mathbf{x}) = \sup_{P_{Y|\mathbf{X}=\mathbf{x}}} H(Y|\mathbf{X} = \mathbf{x}) + \mathbb{E}[\theta(Y)|\mathbf{X} = \mathbf{x}]^T \mathbf{A}\mathbf{x}. \quad (14)$$

Moreover, the definition of the dual norm  $\|\cdot\|_*$  implies

$$\sup_{\mathbf{w}_i} I_{C_i}(\mathbf{w}_i) - \mathbf{A}_i \mathbf{w}_i = \max_{\mathbf{u} \in C_i} -\mathbf{A}_i \mathbf{u} = -\mathbf{A}_i \tilde{\mathbf{E}}_i + \epsilon_i \|\mathbf{A}_i\|_*. \quad (15)$$

Plugging (14) and (15) in (13), the dual problem can be simplified to

$$\begin{aligned} \min_{\mathbf{A}} \mathbb{E}_{Q_{\mathbf{X}}} \left[ F_{\theta}(\mathbf{A}\mathbf{X}) - \sum_{i=1}^t \mathbf{A}_i \tilde{\mathbf{E}}_i \right] + \sum_{i=1}^t \epsilon_i \|\mathbf{A}_i\|_* \\ = \min_{\mathbf{A}} \mathbb{E}_Q [F_{\theta}(\mathbf{A}\mathbf{X}) - \theta(Y)^T \mathbf{A}\mathbf{X}] + \sum_{i=1}^t \epsilon_i \|\mathbf{A}_i\|_*, \end{aligned} \quad (16)$$

which is equal to the primal problem (10) since the strong duality holds. Furthermore, note that we can rewrite the definition given for  $F_{\theta}$  as

$$F_{\theta}(\mathbf{z}) = \max_{\mathbf{E} \in \mathbb{R}^t} G(\mathbf{E}) + \mathbf{E}^T \mathbf{z}, \quad (17)$$

where we define

$$G(\mathbf{E}) = \begin{cases} \max_{P \in \mathcal{P}_Y: \mathbb{E}[\theta(Y)] = \mathbf{E}} H(Y) & \text{if } \{P \in \mathcal{P}_Y : \mathbb{E}[\theta(Y)] = \mathbf{E}\} \neq \emptyset \\ -\infty & \text{Otherwise.} \end{cases} \quad (18)$$

Observe that  $F_{\theta}$  is the convex conjugate of the convex  $-G$ . Therefore, applying the derivative property of convex conjugates [2] to (14),

$$\mathbb{E}_{P^*}[\theta(Y)|\mathbf{X} = \mathbf{x}] \in \partial F_{\theta}(\mathbf{A}^* \mathbf{x}). \quad (19)$$

Here,  $\partial F_{\theta}$  denotes the subgradient of  $F_{\theta}$ . Assuming  $F_{\theta}$  is differentiable at  $\mathbf{A}^* \mathbf{x}$ , (19) implies that

$$\mathbb{E}_{P^*}[\theta(Y)|\mathbf{X} = \mathbf{x}] = \nabla F_{\theta}(\mathbf{A}^* \mathbf{x}). \quad (20)$$

## 2.a A generalization of Theorem 2

It can be seen that the above proof can be slightly generalized to prove the following generalization of Theorem 2.

**Theorem.** *Given a conjugate pair of convex functions  $g, g^*$ , the following duality holds*

$$\max_{P: P_{\mathbf{X}}=Q_{\mathbf{X}}} H(Y|\mathbf{X}) - \sum_{i=1}^t g\left(\mathbb{E}_P[\theta_i(Y)|\mathbf{X}] - \mathbb{E}_Q[\theta_i(Y)|\mathbf{X}]\right) = \quad (21)$$

$$\min_{\mathbf{A} \in \mathbb{R}^{t \times d}} \mathbb{E}_Q [F_{\theta}(\mathbf{A}\mathbf{X}) - \theta(Y)^T \mathbf{A}\mathbf{X}] + \sum_{i=1}^t g^*(\mathbf{A}_i), \quad (22)$$

where  $\mathbf{A}_i$  denotes the  $i$ th row of  $\mathbf{A}$ . In addition, for the optimal  $P^*$  and  $\mathbf{A}^*$

$$\mathbb{E}_{P^*}[\theta(Y)|\mathbf{X} = \mathbf{x}] = \nabla F_{\theta}(\mathbf{A}^* \mathbf{x}). \quad (23)$$

**Corollary.** Consider a pair of dual norms  $\|\cdot\|, \|\cdot\|_*$ . Then, the following duality holds

$$\max_{P: P_X = Q_X} H(Y|\mathbf{X}) - \sum_{i=1}^t \frac{1}{2\lambda_i} \left\| \mathbb{E}_P[\theta_i(Y)\mathbf{X}] - \mathbb{E}_Q[\theta_i(Y)\mathbf{X}] \right\|^2 = \quad (24)$$

$$\min_{\mathbf{A} \in \mathbb{R}^{t \times d}} \mathbb{E}_Q [F_\theta(\mathbf{A}\mathbf{X}) - \theta(Y)^T \mathbf{A}\mathbf{X}] + \sum_{i=1}^t \frac{\lambda_i}{2} \|\mathbf{A}_i\|_*^2, \quad (25)$$

where  $\lambda_i$ 's are positive real numbers and  $\mathbf{A}_i$  denotes the  $i$ th row of  $\mathbf{A}$ . Moreover, for the optimal  $P^*$  and  $\mathbf{A}^*$

$$\mathbb{E}_{P^*}[\theta(Y) | \mathbf{X} = \mathbf{x}] = \nabla F_\theta(\mathbf{A}^* \mathbf{x}). \quad (26)$$

### 3 Proof of Theorem 3

First, we aim to show that

$$\max_{P \in \Gamma(\hat{P})} \mathbb{E}[L(Y, \hat{\psi}_n(\mathbf{X}))] \leq \mathbb{E}_{\hat{P}} [F_\theta(\hat{\mathbf{A}}_n \mathbf{X}) - \theta(Y)^T \hat{\mathbf{A}}_n \mathbf{X}] + \sum_{i=1}^t \epsilon_i \|\hat{\mathbf{A}}_{n_i}\|_* \quad (27)$$

where  $\hat{\mathbf{A}}_n$  denotes the solution to the RHS of the duality equation in Theorem 2 for the empirical distribution  $\hat{P}_n$ . Similar to the duality proven in Theorem 2, we can show that

$$\begin{aligned} \max_{P \in \Gamma(\hat{P})} \mathbb{E}[L(Y, \hat{\psi}_n(\mathbf{X}))] &= \min_{\mathbf{A}} \mathbb{E}_{\hat{P}_X} \left[ \sup_{P_Y | \mathbf{X} \in \mathcal{P}_Y} \mathbb{E}[L(Y, \hat{\psi}_n(\mathbf{X})) | \mathbf{X} = \mathbf{x}] + \mathbb{E}[\theta(Y) | \mathbf{X} = \mathbf{x}]^T \mathbf{A}\mathbf{X} \right] \\ &\quad - \mathbb{E}_{\hat{P}}[\theta(Y)^T \mathbf{A}\mathbf{X}] + \sum_{i=1}^t \epsilon_i \|\mathbf{A}_i\|_* \\ &\leq \mathbb{E}_{\hat{P}_X} \left[ \sup_{P_Y | \mathbf{X} = \mathbf{x} \in \mathcal{P}_Y} \mathbb{E}[L(Y, \hat{\psi}_n(\mathbf{X})) | \mathbf{X} = \mathbf{x}] + \mathbb{E}[\theta(Y) | \mathbf{X}]^T \hat{\mathbf{A}}_n \mathbf{X} \right] \\ &\quad - \mathbb{E}_{\hat{P}}[\theta(Y)^T \hat{\mathbf{A}}_n \mathbf{X}] + \sum_{i=1}^t \epsilon_i \|\hat{\mathbf{A}}_{n_i}\|_* \\ &= \mathbb{E}_{\hat{P}} [F_\theta(\hat{\mathbf{A}}_n \mathbf{X}) - \theta(Y)^T \hat{\mathbf{A}}_n \mathbf{X}] + \sum_{i=1}^t \epsilon_i \|\hat{\mathbf{A}}_{n_i}\|_*. \end{aligned}$$

Here we first upper bound the minimum by taking the specific  $\mathbf{A} = \hat{\mathbf{A}}_n$ . Then the equality holds because  $\hat{\psi}_n$  is a robust Bayes decision rule against  $\Gamma(\hat{P}_n)$  and therefore adding the second term based on  $\hat{\mathbf{A}}_n \mathbf{x}$ ,  $\hat{\psi}_n(\mathbf{x})$  results in a saddle point for the following problem

$$\begin{aligned} F_\theta(\hat{\mathbf{A}}_n \mathbf{X}) &= \sup_{P \in \mathcal{P}_Y} H(Y) + \mathbb{E}[\theta(Y)]^T \hat{\mathbf{A}}_n \mathbf{X} \\ &= \sup_{P \in \mathcal{P}_Y} \inf_{\zeta \in \mathcal{Z}} \mathbb{E}[L(Y, \zeta)] + \mathbb{E}[\theta(Y)]^T \hat{\mathbf{A}}_n \mathbf{X} \\ &= \sup_{P \in \mathcal{P}_Y} \mathbb{E}[L(Y, \hat{\psi}_n(\mathbf{X}))] + \mathbb{E}[\theta(Y)]^T \hat{\mathbf{A}}_n \mathbf{X}. \end{aligned}$$

Therefore, by Theorem 2 we have

$$\begin{aligned} \max_{P \in \Gamma(\hat{P})} \mathbb{E}[L(Y, \hat{\psi}_n(\mathbf{X}))] - \max_{P \in \Gamma(\hat{P})} \mathbb{E}[L(Y, \tilde{\psi}(\mathbf{X}))] &\leq \quad (28) \\ \mathbb{E}_{\hat{P}} [F_\theta(\hat{\mathbf{A}}_n \mathbf{X}) - \theta(Y)^T \hat{\mathbf{A}}_n \mathbf{X}] + \sum_{i=1}^t \epsilon_i \|\hat{\mathbf{A}}_{n_i}\|_* - \mathbb{E}_{\hat{P}} [F_\theta(\tilde{\mathbf{A}} \mathbf{X}) - \theta(Y)^T \tilde{\mathbf{A}} \mathbf{X}] - \sum_{i=1}^t \epsilon_i \|\tilde{\mathbf{A}}_i\|_*. \end{aligned}$$

As a result, we only need to bound the uniform convergence rate in the other side of the duality. Note that by the definition of  $F_\theta$ ,

$$\forall P \in \mathcal{P}_Y, \mathbf{z} \in \mathbb{R}^t : F_\theta(\mathbf{z}) - \mathbb{E}_P[\theta(Y)]^T \mathbf{z} \geq H_P(Y) \geq 0. \quad (29)$$

Hence,  $\forall \mathbf{A} : F_\theta(\mathbf{A}\mathbf{X}) - \mathbb{E}[\theta(Y)]^T \mathbf{A}\mathbf{X} \geq 0$  and comparing the optimal solution to the RHS of the duality equation in Theorem 2 to the case  $\mathbf{A} = \mathbf{0}$  implies that for any possible solution  $\mathbf{A}^*$

$$\forall 1 \leq i \leq t : \quad \epsilon_i \|\mathbf{A}_i^*\|_q \leq \sum_{j=1}^t \epsilon_j \|\mathbf{A}_j^*\|_q \leq F_\theta(\mathbf{0}) = \max_{P \in \mathcal{P}_Y} H(Y) = M. \quad (30)$$

Hence, since  $1 \leq q \leq 2$ , we only need to bound the uniform convergence rate in a bounded space where  $\forall 1 \leq i \leq t : \|\mathbf{A}_i\|_2 \leq \|\mathbf{A}_i\|_q \leq \frac{M}{\epsilon_i}$ . Also, applying the derivative property of the conjugate relationship indicates that  $\partial F_\theta(\mathbf{z})$  is a subset of the convex hull of  $\{\mathbb{E}[\theta(Y)] : P \in \mathcal{P}_Y\}$ . Therefore, when  $\theta(Y)$  includes only one variable, for any  $u \in \partial F_\theta(z)$  we have  $|u| \leq L$ , and  $F_\theta(z) - \theta(Y)z$  is  $2L$ -Lipschitz in  $z$ . As a result, since  $\|\mathbf{X}\|_2 \leq B$  and  $|\theta(Y)| \leq L$  for any  $\alpha_1, \alpha_2 \in \mathbb{R}^d$  such that  $\|\alpha_i\|_2 \leq \frac{M}{\epsilon}$ ,

$$\forall \mathbf{x}_1, \mathbf{x}_2, y_1, y_2 : [F_\theta(\alpha_1^T \mathbf{x}_1) - \theta(y_1)\alpha_1^T \mathbf{x}_1] - [F_\theta(\alpha_2^T \mathbf{x}_2) - \theta(y_2)\alpha_2^T \mathbf{x}_2] \leq \frac{4BML}{\epsilon} \quad (31)$$

Consequently, we can apply standard uniform convergence results given convexity-Lipschitzness-boundedness [3] to show that for any  $\delta > 0$  with a probability at least  $1 - \delta$

$$\forall \alpha \in \mathbb{R}^d, \|\alpha\|_2 \leq \frac{M}{\epsilon} : \quad (32)$$

$$\mathbb{E}_{\hat{P}}[F_\theta(\alpha^T \mathbf{X}) - \theta(Y)\alpha^T \mathbf{X}] - \mathbb{E}_{\hat{P}_n}[F_\theta(\alpha^T \mathbf{X}) - \theta(Y)\alpha^T \mathbf{X}] \leq \frac{4BLM}{\epsilon\sqrt{n}} \left(1 + \sqrt{\frac{\log(2/\delta)}{2}}\right).$$

Therefore, considering  $\hat{\alpha}_n$  and  $\tilde{\alpha}$  as the solution to the dual problems corresponding to the empirical and underlying cases, for any  $\delta > 0$  with a probability at least  $1 - \delta/2$

$$\begin{aligned} & \mathbb{E}_{\hat{P}}[F_\theta(\hat{\alpha}_n^T \mathbf{X}) - \theta(Y)\hat{\alpha}_n^T \mathbf{X}] + \epsilon \|\hat{\alpha}_n\|_q \\ & - \mathbb{E}_{\hat{P}_n}[F_\theta(\hat{\alpha}_n^T \mathbf{X}) - \theta(Y)\hat{\alpha}_n^T \mathbf{X}] - \epsilon \|\hat{\alpha}_n\|_q \leq \frac{4BLM}{\epsilon\sqrt{n}} \left(1 + \sqrt{\frac{\log(4/\delta)}{2}}\right). \end{aligned} \quad (33)$$

Since  $\hat{\alpha}_n$  is minimizing the objective for  $Q = \hat{P}_n$ ,

$$\begin{aligned} & \mathbb{E}_{\hat{P}_n}[F_\theta(\hat{\alpha}_n^T \mathbf{X}) - \theta(Y)\hat{\alpha}_n^T \mathbf{X}] + \epsilon \|\hat{\alpha}_n\|_q \\ & - \mathbb{E}_{\hat{P}_n}[F_\theta(\tilde{\alpha}^T \mathbf{X}) - \theta(Y)\tilde{\alpha}^T \mathbf{X}] - \epsilon \|\tilde{\alpha}\|_q \leq 0. \end{aligned} \quad (34)$$

Also, since  $\tilde{\alpha}$  does not depend on the samples, the Hoeffding's inequality implies that with a probability at least  $1 - \delta/2$

$$\begin{aligned} & \mathbb{E}_{\hat{P}_n}[F_\theta(\tilde{\alpha}^T \mathbf{X}) - \theta(Y)\tilde{\alpha}^T \mathbf{X}] + \epsilon \|\tilde{\alpha}\|_q \\ & - \mathbb{E}_{\hat{P}}[F_\theta(\tilde{\alpha}^T \mathbf{X}) - \theta(Y)\tilde{\alpha}^T \mathbf{X}] - \epsilon \|\tilde{\alpha}\|_q \leq \frac{2BML}{\epsilon} \sqrt{\frac{\log(4/\delta)}{2n}}. \end{aligned} \quad (35)$$

Applying the union bound, combining (33), (34), (35) shows that with a probability at least  $1 - \delta$ , we have

$$\begin{aligned} & \mathbb{E}_{\hat{P}_n}[F_\theta(\hat{\alpha}_n^T \mathbf{X}) - \theta(Y)\hat{\alpha}_n^T \mathbf{X}] + \epsilon \|\hat{\alpha}_n\|_q \\ & - \mathbb{E}_{\hat{P}}[F_\theta(\tilde{\alpha}^T \mathbf{X}) - \theta(Y)\tilde{\alpha}^T \mathbf{X}] - \epsilon \|\tilde{\alpha}\|_q \leq \frac{4BLM}{\epsilon\sqrt{n}} \left(1 + \frac{3}{2} \sqrt{\frac{\log(4/\delta)}{2}}\right). \end{aligned} \quad (36)$$

Given (28) and (36), the proof is complete.

Note that we can improve the result in the case  $q = 1$  by using the same proof and plugging in the Rademacher complexity of the  $\ell_1$ -bounded linear functions. Here, we replace the assumption that  $\|\mathbf{X}\|_2 \leq B$  with  $\|\mathbf{X}\|_\infty \leq B$  which can be much weaker for high-dimensional  $\mathbf{X}$ 's.

**Theorem.** Consider a loss function  $L$  with the entropy  $H$  and suppose  $\theta(Y)$  includes only one element. Let  $M = \max_{P \in \mathcal{P}_Y} H(Y)$  be the maximum entropy value over  $\mathcal{P}_Y$ . Also, take  $\|\cdot\|/\|\cdot\|_*$  to be the  $\ell_\infty/\ell_1$  pair. Given that  $\mathbf{X}$  is a  $d$ -dimensional vector with  $\|\mathbf{X}\|_\infty \leq B$ , and  $|\theta(Y)| \leq L$ , for any  $\delta > 0$  with probability at least  $1 - \delta$

$$\max_{P \in \Gamma(\hat{P})} \mathbb{E}[L(Y, \hat{\psi}_n(\mathbf{X}))] - \max_{P \in \Gamma(\tilde{P})} \mathbb{E}[L(Y, \tilde{\psi}(\mathbf{X}))] \leq \frac{4BLM}{\epsilon\sqrt{n}} \left( \sqrt{2\log(2d)} + \sqrt{\frac{9\log(4/\delta)}{8}} \right). \quad (37)$$

## 4 0-1 Loss: minimax SVM

### 4.a $F_\theta$ derivation

Given the defined one-hot encoding  $\theta$  we define  $\tilde{\mathbf{z}} = (\mathbf{z}, 0)$  and represent each randomized decision rule  $\zeta$  with its corresponding loss vector  $\mathbf{L} \in \mathbb{R}^{t+1}$  such that  $L_i = L_{0,1}(i, \zeta)$  denotes the 0-1 loss suffered by  $\zeta$  when  $Y = i$ . It can be seen that  $\mathbf{L}$  is a feasible loss vector if and only if  $\forall i : 0 \leq L_i \leq 1$  and  $\sum_{i=1}^{t+1} L_i = t$ . Then,

$$F_\theta(\mathbf{z}) = \max_{\substack{\mathbf{p} \in \mathbb{R}^{t+1} : \mathbf{1}^T \mathbf{p} = 1, \\ \forall i : 0 \leq p_i}} \min_{\substack{\mathbf{L} \in \mathbb{R}^{t+1} : \mathbf{1}^T \mathbf{L} = t, \\ \forall i : 0 \leq L_i \leq 1}} \sum_{i=1}^{t+1} p_i (\tilde{z}_i + L_i). \quad (38)$$

Hence, Sion's minimax theorem implies that the above minimax problem has a saddle point. Thus,

$$F_\theta(\mathbf{z}) = \min_{\substack{\mathbf{L} \in \mathbb{R}^{t+1} : \mathbf{1}^T \mathbf{L} = t, \\ \forall i : 0 \leq L_i \leq 1}} \max_{1 \leq i \leq t+1} \{\tilde{z}_i + L_i\}. \quad (39)$$

Consider  $\sigma$  as the permutation sorting  $\tilde{\mathbf{z}}$  in a descending order and for simplicity let  $\tilde{z}_{(i)} = \tilde{z}_{\sigma(i)}$ . Then,

$$\forall 1 \leq k \leq t+1 : \max_{1 \leq i \leq t+1} \{\tilde{z}_i + L_i\} \geq \frac{1}{k} \sum_{i=1}^k [\tilde{z}_{\sigma(i)} + L_{\sigma(i)}] \geq \frac{k-1 + \sum_{i=1}^k \tilde{z}_{(i)}}{k}, \quad (40)$$

which is independent of the value of  $L_i$ 's. Therefore,

$$\max_{1 \leq k \leq t+1} \frac{k-1 + \sum_{i=1}^k \tilde{z}_{(i)}}{k} \leq F_\theta(\mathbf{z}). \quad (41)$$

On the other hand, if we let  $k_{\max}$  be the largest index satisfying  $\sum_{i=1}^{k_{\max}} [\tilde{z}_{(i)} - \tilde{z}_{(k_{\max})}] < 1$  and define

$$\forall 1 \leq j \leq t+1 : L_{\sigma(j)}^* = \begin{cases} \frac{k_{\max} - 1 + \sum_{i=1}^{k_{\max}} \tilde{z}_{(i)}}{k_{\max}} - \tilde{z}_{(j)} & \text{if } \sigma(j) \leq k_{\max} \\ 1 & \text{if } \sigma(j) > k_{\max}, \end{cases} \quad (42)$$

we can simply check that  $\mathbf{L}^*$  is a feasible point since  $\sum_{i=1}^{t+1} L_i^* = t$  and  $L_{\sigma(k_{\max})}^* \leq 1$  so for all  $i$ 's  $L_{\sigma(i)}^* \leq 1$ . Also,  $L_{\sigma(1)}^* \geq 0$  because  $\tilde{z}_{(1)} - \tilde{z}_{(j)} < 1$  for any  $j \leq k_{\max}$ , so for all  $i$ 's  $L_{\sigma(i)}^* \geq 0$ . Then for this  $\mathbf{L}^*$  we have

$$F_\theta(\mathbf{z}) \leq \max_{1 \leq i \leq t+1} \{\tilde{z}_i + L_i^*\} = \frac{k_{\max} - 1 + \sum_{i=1}^{k_{\max}} \tilde{z}_{(i)}}{k_{\max}}. \quad (43)$$

Therefore, (41) holds with equality and achieves its maximum at  $k = k_{\max}$ ,

$$F_\theta(\mathbf{z}) = \max_{1 \leq k \leq t+1} \frac{k-1 + \sum_{i=1}^k \tilde{z}_{(i)}}{k} = \frac{k_{\max} - 1 + \sum_{i=1}^{k_{\max}} \tilde{z}_{(i)}}{k_{\max}}. \quad (44)$$

Moreover,  $\mathbf{L}^*$  corresponds to a randomized robust Bayes act, where we select label  $i$  according to the probability vector  $\mathbf{p}^* = \mathbf{1} - \mathbf{L}^*$  that is

$$\forall 1 \leq j \leq t+1 : p_{\sigma(j)}^* = \begin{cases} \frac{1 - \sum_{i=1}^{k_{\max}} \tilde{z}_{(i)}}{k_{\max}} + \tilde{z}_{(j)} & \text{if } \sigma(j) \leq k_{\max} \\ 0 & \text{if } \sigma(j) > k_{\max}. \end{cases} \quad (45)$$

Given  $F_\theta$  we can simply derive the gradient  $\nabla F_\theta$  to find the entropy maximizing distribution. Here if the inequality  $\sum_{i=1}^{k_{\max}} [\tilde{z}_{\sigma(i)} - \tilde{z}_{(k_{\max}+1)}] \geq 1$  holds strictly, which is true almost everywhere on  $\mathbb{R}^t$ ,

$$\forall 1 \leq i \leq t : (\nabla F_\theta(\mathbf{z}))_i = \begin{cases} 1/k_{\max} & \text{if } \sigma(i) \leq k_{\max}, \\ 0 & \text{Otherwise.} \end{cases} \quad (46)$$

If the inequality does not strictly hold,  $F_\theta$  is not differentiable at  $\mathbf{z}$ ; however, the above vector still lies in the subgradient  $\partial F_\theta(\mathbf{z})$ .

#### 4.b Sufficient Conditions for Applying Theorem 1.a

As supposed in Theorem 1.a, the space  $\mathcal{X}$  should be finite in order to apply that result. Here, we show for the proposed structure on  $\Gamma(Q)$  one can relax this condition while Theorem 1.a still holds. It is because, as shown in the proofs of Theorems 2 and 3, we have

$$\begin{aligned} \inf_{\psi \in \Psi} \max_{P \in \Gamma(\tilde{P})} \mathbb{E}[L(Y, \psi(\mathbf{X}))] &= \inf_{\psi \in \Psi} \min_{\mathbf{A}} \mathbb{E}_{\tilde{P}_X} \left[ \sup_{P_{Y|\mathbf{X}} \in \mathcal{P}_Y} \mathbb{E}[L(Y, \psi(\mathbf{X}))|\mathbf{X} = \mathbf{x}] \right. \\ &\quad \left. + \mathbb{E}[\boldsymbol{\theta}(Y)|\mathbf{X} = \mathbf{x}]^T \mathbf{A} \mathbf{X} \right] - \mathbb{E}_{\tilde{P}}[\boldsymbol{\theta}(Y)^T \mathbf{A} \mathbf{X}] + \sum_{i=1}^t \epsilon_i \|\mathbf{A}_i\|_* \\ &= \min_{\mathbf{A}} \mathbb{E}_{\tilde{P}_X} \left[ \inf_{\psi(\mathbf{x}) \in \mathcal{Z}} \sup_{P_{Y|\mathbf{X}} \in \mathcal{P}_Y} \mathbb{E}[L(Y, \psi(\mathbf{x}))|\mathbf{X} = \mathbf{x}] \right. \\ &\quad \left. + \mathbb{E}[\boldsymbol{\theta}(Y)|\mathbf{X} = \mathbf{x}]^T \mathbf{A} \mathbf{X} \right] - \mathbb{E}_{\tilde{P}}[\boldsymbol{\theta}(Y)^T \mathbf{A} \mathbf{X}] + \sum_{i=1}^t \epsilon_i \|\mathbf{A}_i\|_*. \end{aligned}$$

Therefore, given this structure the minimax problem decouples across different  $\mathbf{x}$ 's. Hence, the assumption of finite  $\mathcal{X}$  is no longer needed, because as long as  $\boldsymbol{\theta}$  is a bounded function (which is true for the one-hot encoding  $\boldsymbol{\theta}$ ), the rest of assumptions suffice to guarantee the existence of a saddle point given  $\mathbf{X} = \mathbf{x}$  for any  $\mathbf{x}$ .

### 5 Quadratic Loss: Linear Regression

#### 5.a $F_\theta$ derivation

Here, we find  $F_\theta(\mathbf{z}) = \max_{P \in \mathcal{P}_Y} H(Y) + \mathbb{E}[\boldsymbol{\theta}(Y)]^T \mathbf{z}$  for  $\boldsymbol{\theta}(Y) = Y$  and  $\mathcal{P}_Y = \{P_Y : \mathbb{E}[Y^2] \leq \rho^2\}$ . Since for quadratic loss  $H(Y) = \text{Var}(Y) = \mathbb{E}[Y^2] - \mathbb{E}[Y]^2$ , the problem is equivalent to

$$F_\theta(z) = \max_{\mathbb{E}[Y^2] \leq \rho^2} \mathbb{E}[Y^2] - \mathbb{E}[Y]^2 + z\mathbb{E}[Y] \quad (47)$$

As  $\mathbb{E}[Y]^2 \leq \mathbb{E}[Y^2]$ , it can be seen for the solution  $\mathbb{E}_{P^*}[Y^2] = \rho^2$  and therefore we equivalently solve

$$F_\theta(z) = \max_{|\mathbb{E}[Y]| \leq \rho} \rho^2 - \mathbb{E}[Y]^2 + z\mathbb{E}[Y] = \begin{cases} \rho^2 + z^2/4 & \text{if } |z/2| \leq \rho \\ \rho|z| & \text{if } |z/2| > \rho. \end{cases} \quad (48)$$

#### 5.b Applying Theorem 2 while restricting $\mathcal{P}_Y$

For the quadratic loss, we first change  $\mathcal{P}_Y = \{P_Y : \mathbb{E}[Y^2] \leq \rho^2\}$  and then apply Theorem 2. Note that by modifying  $F_\theta$  based on the new  $\mathcal{P}_Y$  we also solve a modified version of the maximum conditional entropy problem

$$\max_{\substack{P: P_{\mathbf{X}}, Y \in \Gamma(Q) \\ \forall \mathbf{x}: P_{Y|\mathbf{X}=\mathbf{x}} \in \mathcal{P}_Y}} H(Y|\mathbf{X}) \quad (49)$$

In the case  $\mathcal{P}_Y = \{P_Y : \mathbb{E}[Y^2] \leq \rho^2\}$  Theorem 2 remains valid given the above modification in the maximum conditional entropy problem. This is because the inequality constraint  $\mathbb{E}[Y^2|\mathbf{X} = \mathbf{x}] \leq \rho^2$  is linear in  $P_{Y|\mathbf{X}=\mathbf{x}}$ , and thus the problem is still convex and strong duality holds as well. Also, when we move the constraints of  $\mathbf{w}_i = \mathbb{E}_P[\boldsymbol{\theta}_i(Y)\mathbf{X}]$  to the objective function, we get a similar dual problem

$$\min_{\mathbf{A}} \sup_{\substack{P_{Y|\mathbf{X}}, \mathbf{w}: \\ \forall \mathbf{x}: P_{Y|\mathbf{X}=\mathbf{x}} \in \mathcal{P}_Y}} \mathbb{E}_{Q_{\mathbf{X}}} \left[ H_P(Y|\mathbf{X} = \mathbf{x}) + \sum_{i=1}^t \mathbb{E}[\boldsymbol{\theta}_i(Y)|\mathbf{X} = \mathbf{x}] \mathbf{A}_i \mathbf{X} \right] + \sum_{i=1}^t [I_{C_i}(\mathbf{w}_i) - \mathbf{A}_i \mathbf{w}_i] \quad (50)$$

Following the next steps of the proof of Theorem 2, we complete the proof assuming the modification on  $F_\theta$  and the maximum conditional entropy problem.

### 5.c Derivation of group lasso

To derive the group lasso problem, we slightly change the structure of  $\Gamma(Q)$ . First assume the subsets  $I_1, \dots, I_k$  are disjoint. Consider a set of distributions  $\Gamma_{\text{GL}}(Q)$  with the following structure

$$\Gamma_{\text{GL}}(Q) = \{ P_{\mathbf{X}, Y} : P_{\mathbf{X}} = Q_{\mathbf{X}}, \quad \forall 1 \leq j \leq k : \|\mathbb{E}_P[Y\mathbf{X}_{I_j}] - \mathbb{E}_Q[Y\mathbf{X}_{I_j}]\| \leq \epsilon_j \}. \quad (51)$$

Now we prove a modified version of Theorem 2,

$$\max_{P \in \Gamma_{\text{GL}}(Q)} H(Y|\mathbf{X}) = \min_{\boldsymbol{\alpha}} \mathbb{E}_Q [F_{\theta}(\boldsymbol{\alpha}^T \mathbf{X}) - Y \boldsymbol{\alpha}^T \mathbf{X}] + \sum_{j=1}^k \epsilon_j \|\boldsymbol{\alpha}_{I_j}\|_*. \quad (52)$$

To prove this identity, we can use the same proof provided for Theorem 2. We only need to redefine  $\tilde{\mathbf{E}}_j = \mathbb{E}_Q[Y\mathbf{X}_{I_j}]$  and  $C_j = \{\mathbf{u} : \|\mathbf{u} - \tilde{\mathbf{E}}_j\| \leq \epsilon_j\}$  for  $1 \leq j \leq k$ . Notice that here  $t = 1$ . Using the same technique in that proof, the dual problem can be formulated as

$$\min_{\boldsymbol{\alpha}} \sup_{P_{Y|\mathbf{X}}, \mathbf{w}} \mathbb{E}_{Q_{\mathbf{X}}} [H_P(Y|\mathbf{X} = \mathbf{x}) + \mathbb{E}[Y|\mathbf{X} = \mathbf{x}] \boldsymbol{\alpha}^T \mathbf{X}] + \sum_{j=1}^k [I_{C_j}(\mathbf{w}_{I_j}) - \boldsymbol{\alpha}_{I_j}^T \mathbf{w}_{I_j}]. \quad (53)$$

Similarly, we can decouple and simplify the above problem to derive the RHS of (52). Then, if we let  $\|\cdot\|$  be the  $\ell_q$ -norm, we will get the group lasso problem with the  $\ell_{1,p}$  regularizer.

If the subsets are not disjoint, we can create new copies of each feature corresponding to a repeated index, such that there will be no repeated indices after adding the new features. Note that since  $P_{\mathbf{X}}$  has been fixed over  $\Gamma_{\text{GL}}(Q)$  adding the extra copies of original features does not change the maximum-conditional entropy problem. Hence, we can use the result proven for the disjoint case and derive the overlapping group lasso problem.

## References

- [1] Maurice Sion. On general minimax theorems. *Pacific J. Math*, 8(1):171–176, 1958.
- [2] Ralph Rockafellar. Characterization of the subdifferentials of convex functions. *Pacific Journal of Mathematics*, 17(3):497–510, 1966.
- [3] Peter L Bartlett and Shahar Mendelson. Rademacher and gaussian complexities: Risk bounds and structural results. *Journal of Machine Learning Research*, 3(Nov):463–482, 2002.
